# Supplementary material for: Spontaneous formation of light-trapping nano-structures for top-illumination organic solar cells
Source: Royal Society of Chemistry journal article supplement (doi:10.1039/c3nr05674k), 2013-12-05
Supplement: c3nr05674k.pdf [file c3nr05674k.pdf]

## Electronic Supplementary Information

### Spontaneous formation of light-trapping nano-structures for top-illumination organic solar cells

Zheng-Yu Huang,<sup>a</sup> Si-Wen Chiu,<sup>a</sup> Chang-Wen Chen,<sup>a</sup> Yi-Hong Chen,<sup>a</sup> Li-Yen Lin,<sup>b</sup>  
Ken-Tsung Wong<sup>b,c</sup> and Hao-Wu Lin<sup>\*,a</sup>

<sup>a</sup> Department of Materials Science and Engineering, National Tsing Hua University, No. 101, Section 2, Kuang-Fu Road, Hsinchu, Taiwan 30013.

E-mail: hwlin@mx.nthu.edu.tw

<sup>b</sup> Department of Chemistry, National Taiwan University, <sup>c</sup> Institute of Atomic and Molecular Sciences, Academia Sinica, No.1, Section 4, Roosevelt Road, Taipei, Taiwan 10617.

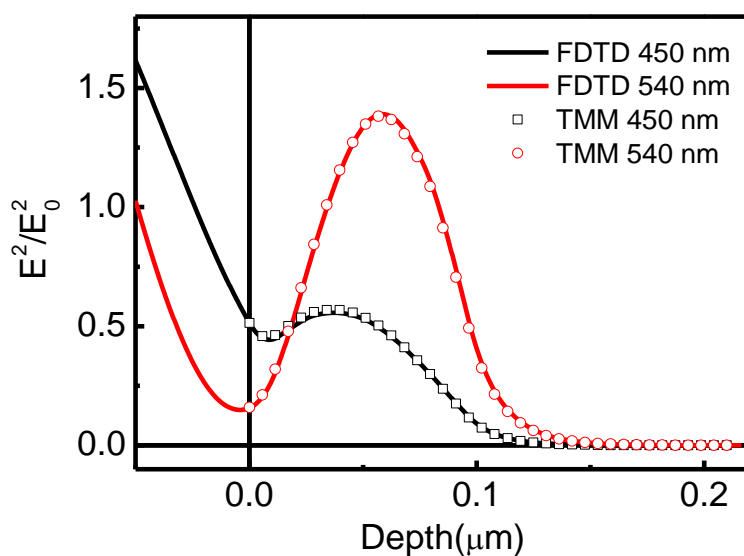

**Fig. S1**  $E$  distribution in the device without a capping layer simulated by FDTD (lines) and TMM (dots) methods.

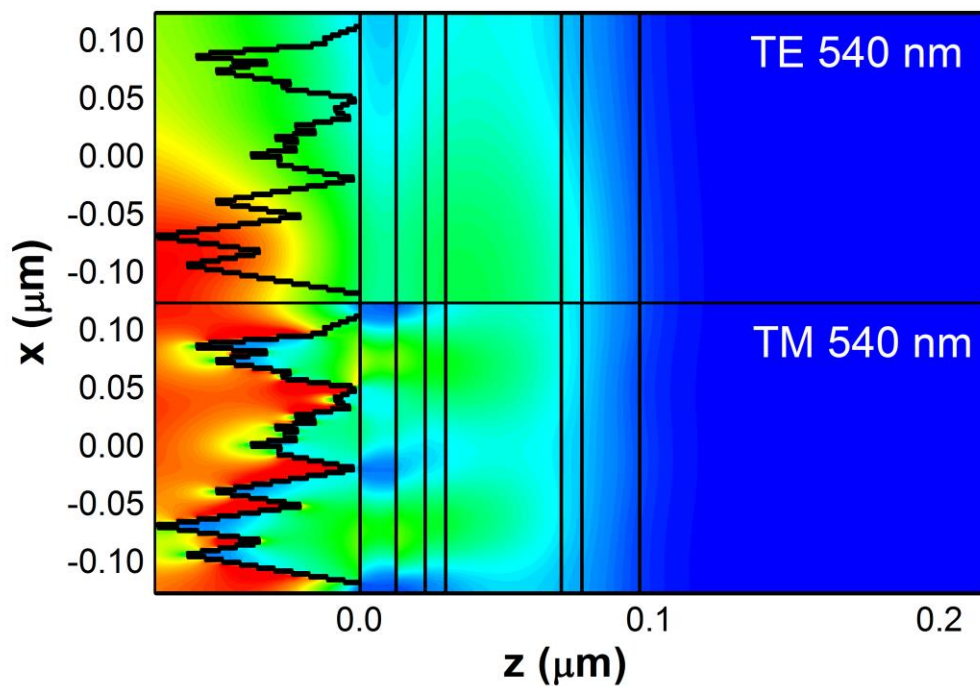

**Fig. S2** *E* distribution in TE and TM polarization modes at wavelengths of 540 nm in the Bphen capped device. The device structure used in the simulation is depicted by black lines. From left to right: Air/Bphen/Ag/BCP/C<sub>70</sub>/ DTDCTP:C<sub>70</sub>/ DTDCTP/MoO<sub>3</sub>/Ag.

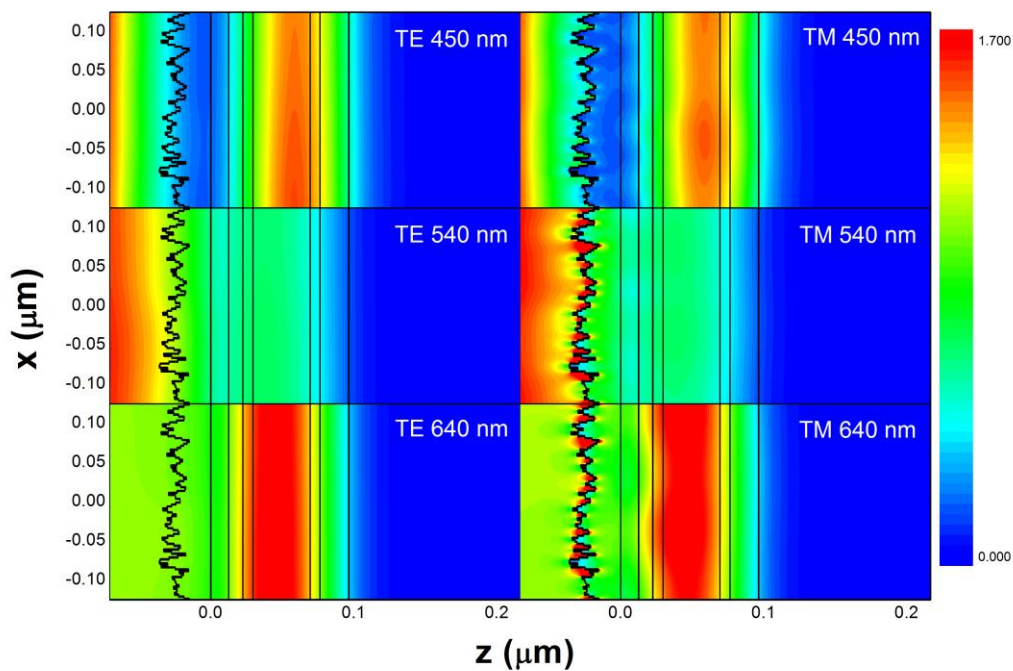

**Fig. S3** *E* distribution in TE and TM polarization modes at wavelengths of 450 nm, 540 nm and 640 nm in the NTCDA-capped device. The device structure used in the simulation is depicted by black lines. From left to right: Air/NTCDA/Ag/BCP/C<sub>70</sub>/DTDCTP:C<sub>70</sub>/DTDCTP/MoO<sub>3</sub>/Ag.

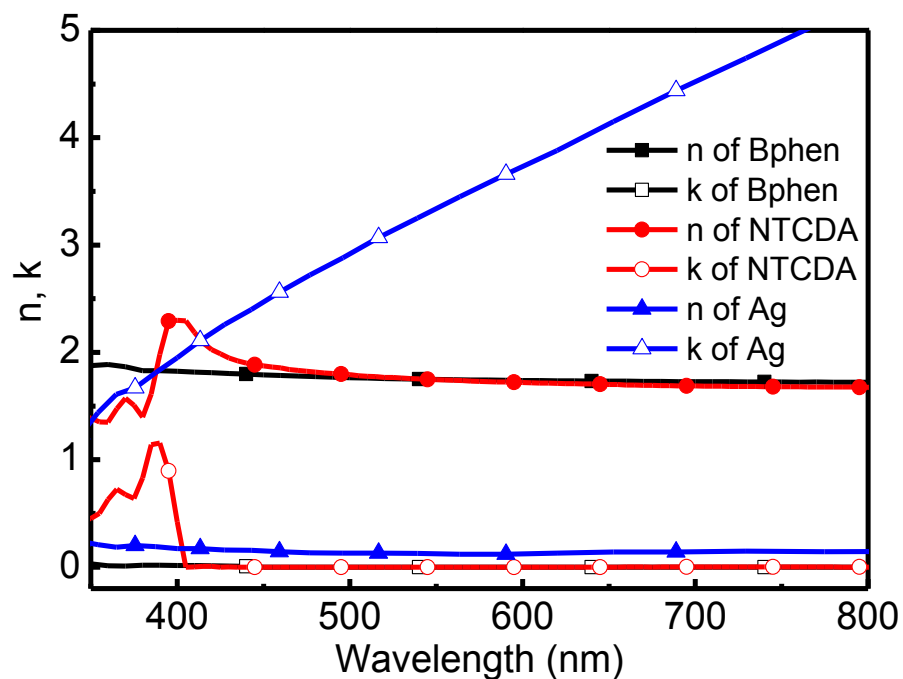

**Fig. S4** Optical constants ( $n$ : refractive index,  $k$ : extinction coefficient) of Bphen, NTCDA and Ag. The values were obtained using a spectroscopic ellipsometer and used in the optical simulation.
